# Supplementary material
Source: publisher figshare collection journal article supplement (https://tandf.figshare.com/ndownloader/files/21741141)
Supplement: Supplementary file 1 [file 21741141]

**Supplementary Table 1**. Literature search terms.

| **1** | acute wound infections OR surgical site infections OR accidental wound infections OR post-traumatic infections |
| --- | --- |
| **2** | 1 AND (antimicrobial prophylaxis duration OR antibiotic prophylaxis duration) |
| **3** | 1 AND (necrotizing fasciitis OR pain out of proportion) |
| **4** | 1 AND (source control OR surgical debridement OR drainage) |
| **5** | 1 AND (diagnostic microbiology OR wound swab OR tissue swab OR wound culture) |
| **6** | 1 AND (antibiograms OR microbiological testing OR susceptibility testing) |
| **7** | 1 AND (antibiotic panels) |
| **8** | 1 AND (pharmacokinetics OR pharmacodynamics OR pharmacology OR skin penetration rate) |
| **9** | 1 AND (empirical broad spectrum antibiotic OR inappropriate empirical antibiotics) |
| **10** | 1 AND (topical antibiotics OR topical antimicrobials) |
| **11** | 1 AND (antiseptic OR wound disinfection OR wound care OR wound cleansing) |
| **12** | 1 AND (hospital discharge OR length of hospital stay OR prolonged hospitalization) |
| **13** | 1 AND (early discharge OR education OR outpatient management OR discharge plan) |
